# Supplementary material for: Dietary Patterns in Primary School are of Prospective Relevance for the Development of Body Composition in Two German Pediatric Populations
Source: Nutrients. 2018 Oct 5;10(10):1442. doi: 10.3390/nu10101442 (PMC6213904; doi:10.3390/nu10101442)
Supplement: Supplementary file 1 [file nutrients-10-01442-s001.pdf]

**Table S1.** Food groups assessed by the food propensity questionnaire (FPQ) in KOPS at baseline (n=372).

| <b>Food group</b>    | <b>Median<sup>a</sup></b> | <b>P25</b> | <b>P75</b> |
|----------------------|---------------------------|------------|------------|
| Whole-grain bread    | 2                         | 2          | 3          |
| White bread          | 2                         | 2          | 3          |
| Cheese, curd, yogurt | 2                         | 2          | 3          |
| Fruits               | 3                         | 2          | 3          |
| Vegetables, salad    | 2                         | 2          | 3          |
| Sweets               | 2                         | 2          | 3          |
| Savory bakery goods  | 1                         | 0          | 1          |
| Lemonade             | 0                         | 0          | 1          |
| Meat                 | 2                         | 2          | 3          |
| Chocolate spread     | 1                         | 0          | 2          |
| Jam, Honey           | 1.5                       | 1          | 2          |
| Cornflakes           | 2                         | 1          | 2          |
| Muesli               | 1                         | 0          | 2          |
| Children's yogurt    | 1                         | 0          | 2          |
| Pasta                | 1                         | 1          | 2          |
| Potatoes             | 2                         | 2          | 2          |
| French fries         | 0                         | 0          | 1          |
| Lasagna              | 0                         | 0          | 0          |
| Fish fingers         | 0                         | 0          | 1          |
| Pizza                | 0                         | 0          | 1          |
| Curry-sausage        | 0                         | 0          | 0          |
| Meat balls           | 0                         | 0          | 1          |
| Pancakes             | 0                         | 0          | 1          |
| Potato fritters      | 0                         | 0          | 0          |

P, percentile; <sup>a</sup> Median food group consumption frequency.

**Table S2.** Food groups assessed in IDEFICS-Germany by the Children's Eating Habits Questionnaire (CEHQ) at baseline (n=298).

| Food group                                                  | Median <sup>a</sup> | P25 | P75 |
|-------------------------------------------------------------|---------------------|-----|-----|
| Cooked vegetables, potatoes and beans, and legumes          | 4                   | 3   | 5   |
| Raw vegetables                                              | 3                   | 2   | 4   |
| Potatoes (fried, croquettes)                                | 1                   | 1   | 2   |
| Fresh fruits without added sugar                            | 4                   | 3   | 5   |
| Fresh fruits with added sugar                               | 1                   | 1   | 2   |
| Water                                                       | 5                   | 5   | 5   |
| Fruit juices                                                | 3                   | 2   | 5   |
| Sweetened drinks                                            | 1                   | 1   | 3   |
| Diet soft drinks                                            | 1                   | 1   | 2   |
| Plain unsweetened milk                                      | 4                   | 3   | 4   |
| Sweetened milk                                              | 2                   | 1   | 3   |
| Cheese (sliced and spreadable)                              | 4                   | 3   | 5   |
| Plain unsweetened yogurt or kefir                           | 1                   | 1   | 2   |
| Sweet yogurt, fermented milk beverages                      | 3                   | 2   | 3   |
| Fresh fish, not fried                                       | 1                   | 1   | 2   |
| Fried fish, fish fingers                                    | 2                   | 1   | 2   |
| Cured meat and sausages                                     | 3                   | 2   | 4   |
| Fresh meat, not fried                                       | 2                   | 1   | 2   |
| Fried meat                                                  | 2                   | 2   | 2   |
| Fried or scrambled eggs                                     | 1                   | 1   | 2   |
| Boiled or poached eggs                                      | 1                   | 1   | 2   |
| Mayonnaise and similar                                      | 1                   | 1   | 1.5 |
| Meat replacement products                                   | 1                   | 1   | 1   |
| Honey, jam                                                  | 2                   | 1   | 3   |
| Chocolate or nut-based spreads on bread                     | 2                   | 1   | 3   |
| Butter, margarine on bread                                  | 4                   | 1   | 5   |
| Low-fat butter, margarine on bread                          | 1                   | 1   | 4   |
| Ketchup and similar                                         | 2                   | 1   | 2   |
| Breakfast cereals and muesli, sweetened                     | 2                   | 1   | 3   |
| Breakfast cereals and muesli, unsweetened                   | 1                   | 1   | 2   |
| Bread, white                                                | 3                   | 2   | 4   |
| Bread, wholemeal                                            | 3                   | 2   | 4   |
| Pasta, noodles, rice                                        | 2                   | 2   | 2   |
| Dish of milled cereals                                      | 1                   | 1   | 2   |
| Pizza as main dish                                          | 1                   | 1   | 1   |
| Hamburger, hot dog, kebab, falafel                          | 1                   | 1   | 1   |
| Nuts, seeds, dried fruits                                   | 1                   | 1   | 2   |
| Savory snacks (Crisps, corn crisps, popcorn)                | 1                   | 1   | 2   |
| Savory pastries, fritters                                   | 1                   | 1   | 1   |
| Chocolate, candy bars                                       | 2                   | 1   | 3   |
| Candies, loose candies, marshmallow                         | 3                   | 2   | 3   |
| Sweet snacks (biscuits, packaged cakes, pastries, puddings) | 2                   | 2   | 3   |
| Ice cream, milk or fruit based bars                         | 2                   | 1   | 2   |

P, percentile; <sup>a</sup> Median food group consumption frequency.
